# Supplementary material for: Use of an In Vitro Skin Parallel Artificial Membrane Assay (Skin-PAMPA) as a Screening Tool to Compare Transdermal Permeability of Model Compound 4-Phenylethyl-Resorcinol Dissolved in Different Solvents
Source: MDPI journal article supplement (doi:10.3390/pharmaceutics13111758), 2021-10-21
Supplement: s1 [file s1]

# Supplementary Materials: Use of an In Vitro Skin Parallel Artificial Membrane Assay (Skin-PAMPA) As a Screening Tool to Compare Transdermal Permeability of Model Compound 4-Phenylethyl-Resorcinol Dissolved in Different Solvents

Bálint Sinkó, Vivien Bárdos, Dániel Vesztergombi, Szabina Kádár, Petra Malcsiner, Anne Moustie, Chantal Jouy, Krisztina Takács-Novák and Sebastien Grégoire

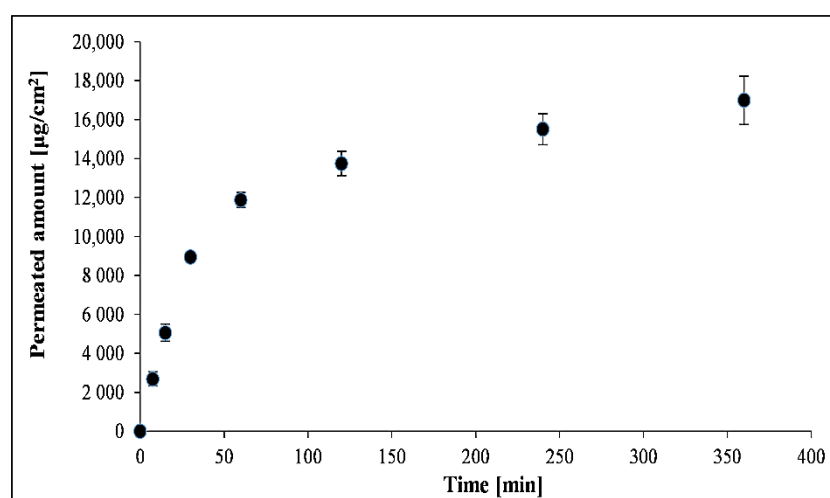

Figure S1. The permeability profile of PER dissolved in ethanol using Skin-PAMPA.

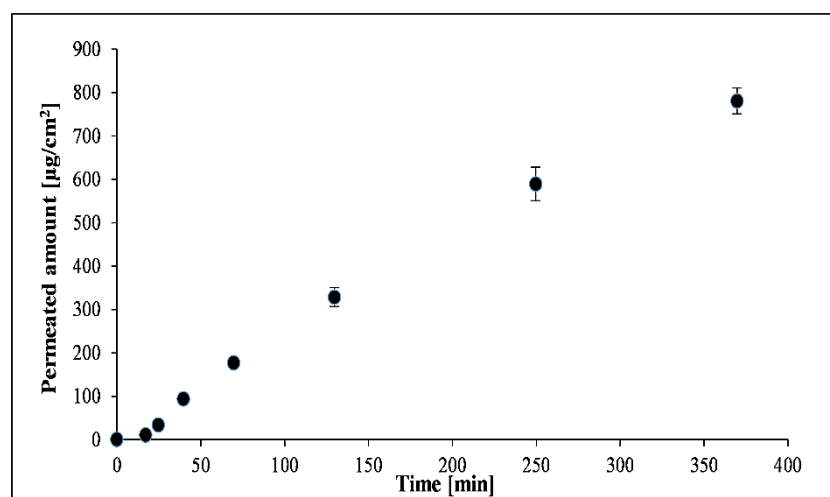

Figure S2. The permeability profile of PER dissolved in glycerol using Skin-PAMPA.

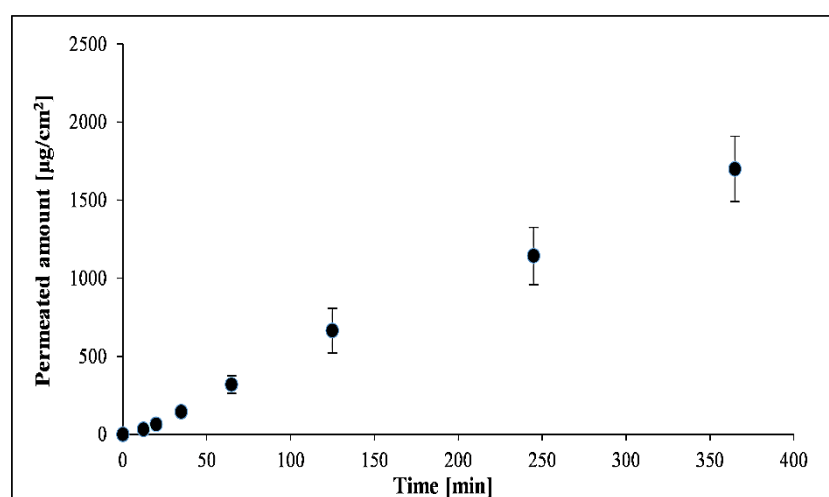

Figure S3. The permeability profile of PER dissolved in dimethylisorbide using Skin-PAMPA.

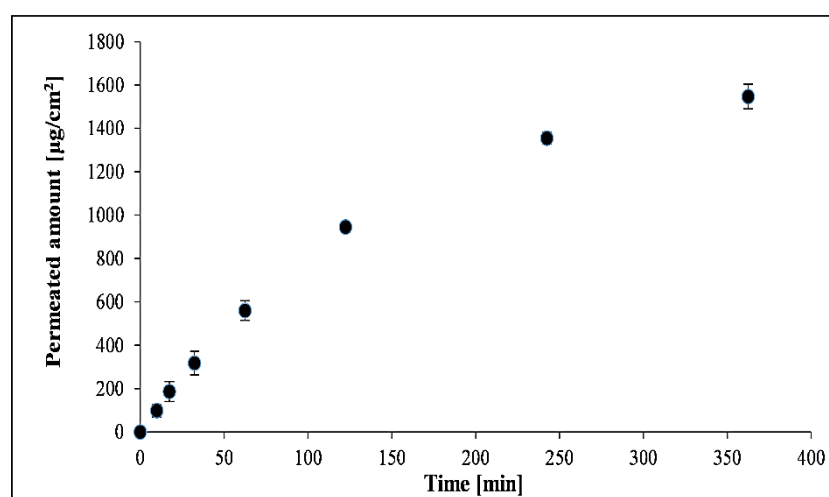

Figure S4. The permeability profile of PER dissolved in water/ethanol – 80:20 (*w/w*) using Skin-PAMPA.

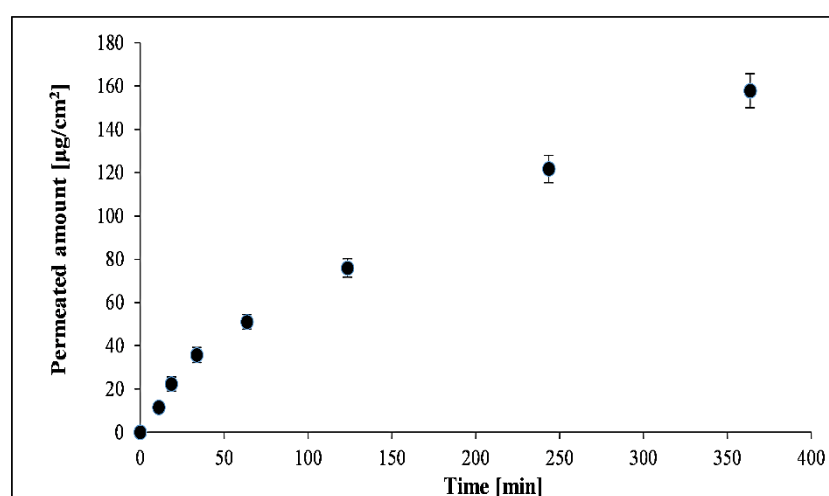

Figure S5. The permeability profile of PER dissolved in water/dimethylisorbide – 90:10 (*w/w*) using Skin-PAMPA.

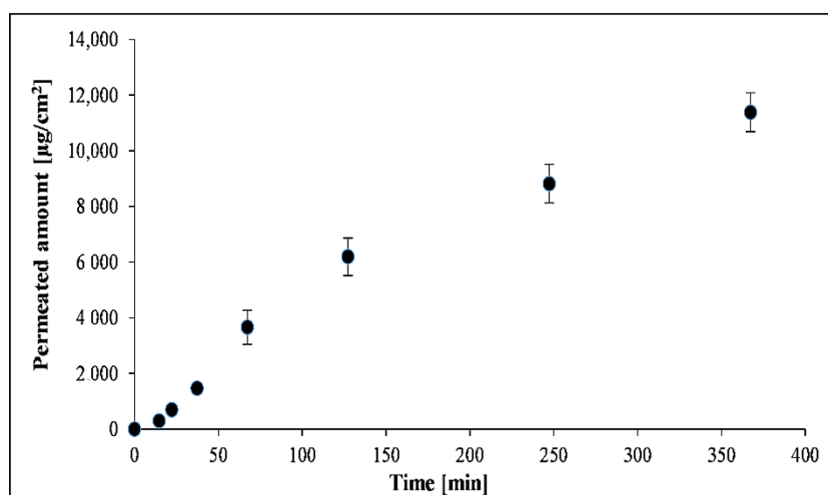

Figure S6. The permeability profile of PER dissolved in propylene glycol using Skin-PAMPA.

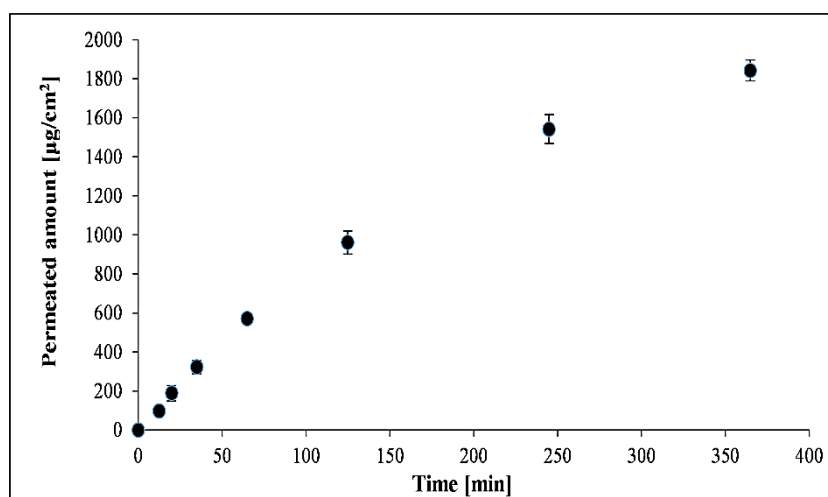

Figure S7. The permeability profile of PER dissolved in water:propylene glycol – 80:20 (w/w) using Skin-PAMPA.

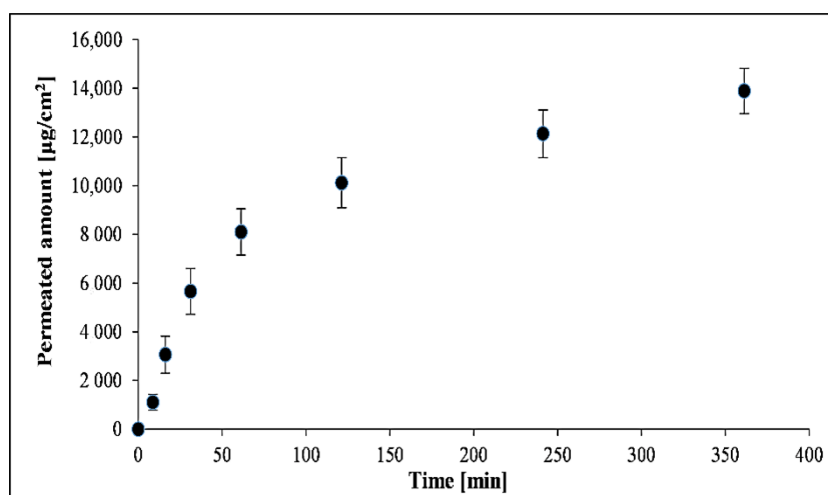

Figure S8. The permeability profile of PER dissolved in water/propylenglycol/ethanol – 10:30:60 (w/w/w) using Skin-PAMPA.

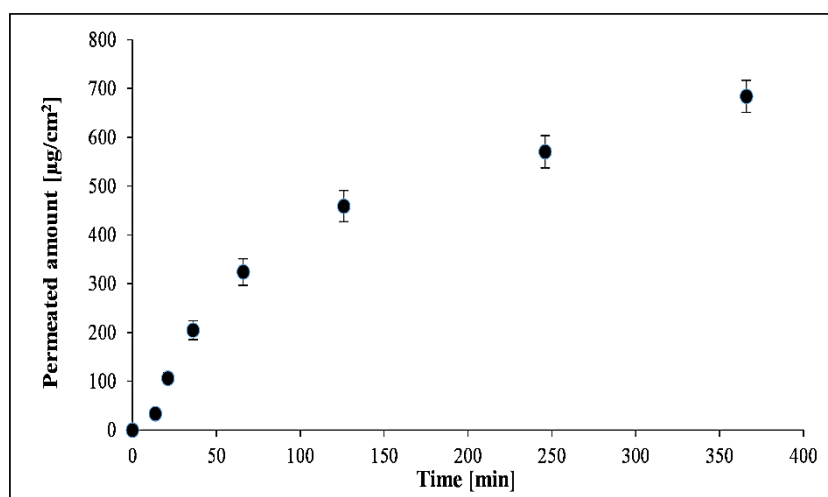

Figure S9. The permeability profile of PER dissolved in capric/caprylic triglycerides using Skin-PAMPA.

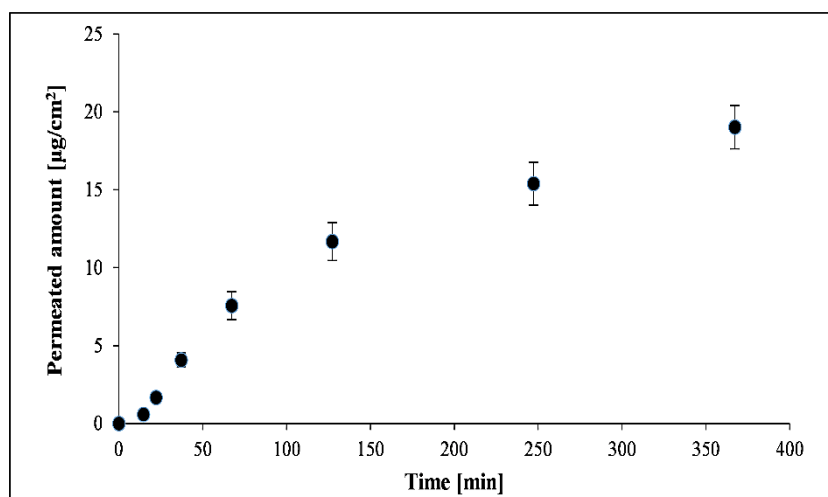

Figure S10. The permeability profile of PER dissolved in octyl dodecanol using Skin-PAMPA.

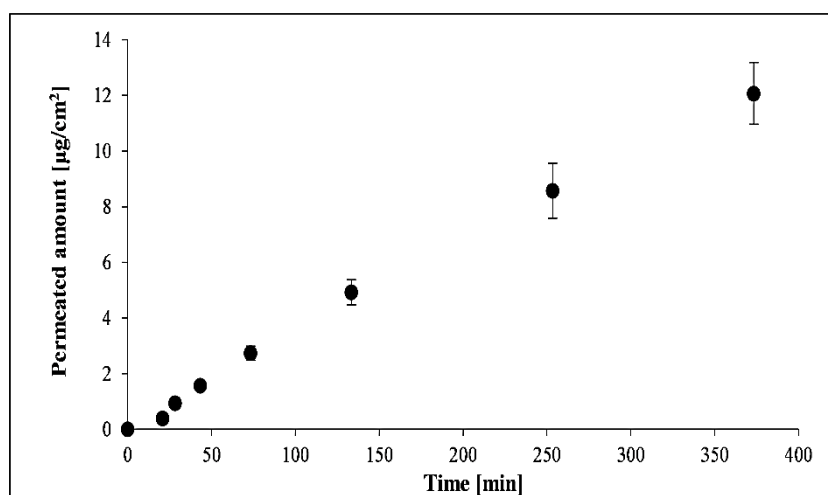

Figure S11. The permeability profile of PER dissolved in apricot kernel oil using Skin-PAMPA.

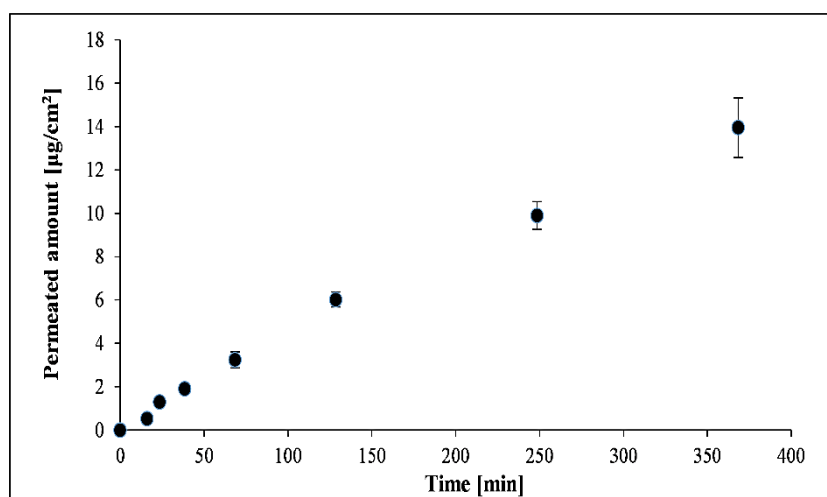

**Figure S12.** The permeability profile of PER dissolved in corn oil using Skin-PAMPA.
